# Supplementary material
Source: publisher site journal article supplement (https://www.dovepress.com/get_supplementary_file.php?f=422835.docx)
Supplement: Supplementary file 1 [file get_supplementary_file.php]

Supplementary table 1 List of hub genes and targeted miRNAs

| gene miRNA |
| --- |
| HIF1A hsa-let-7b-5p |
| HIF1A hsa-mir-106a-3p |
| HIF1A hsa-mir-106a-5p |
| HIF1A hsa-mir-106b-3p |
| HIF1A hsa-mir-106b-5p |
| HIF1A hsa-mir-107 |
| HIF1A hsa-mir-1322 |
| HIF1A hsa-mir-138-1-3p |
| HIF1A hsa-mir-138-5p |
| HIF1A hsa-mir-142-5p |
| HIF1A hsa-mir-145-5p |
| HIF1A hsa-mir-151a-3p |
| HIF1A hsa-mir-153-5p |
| HIF1A hsa-mir-155-5p |
| HIF1A hsa-mir-17-5p |
| HIF1A hsa-mir-186-5p |
| HIF1A hsa-mir-18a-5p |
| HIF1A hsa-mir-18b-5p |
| HIF1A hsa-mir-1910-3p |
| HIF1A hsa-mir-199a-5p |
| HIF1A hsa-mir-199b-5p |
| HIF1A hsa-mir-200c-5p |
| HIF1A hsa-mir-20a-5p |
| HIF1A hsa-mir-20b-5p |
| HIF1A hsa-mir-210-3p |
| HIF1A hsa-mir-21-5p |
| HIF1A hsa-mir-217 |
| HIF1A hsa-mir-22-3p |
| HIF1A hsa-mir-2682-5p |
| HIF1A hsa-mir-27a-3p |
| HIF1A hsa-mir-299-5p |
| HIF1A hsa-mir-3074-3p |
| HIF1A hsa-mir-3121-3p |
| HIF1A hsa-mir-3128 |
| HIF1A hsa-mir-3160-3p |
| HIF1A hsa-mir-329-5p |
| HIF1A hsa-mir-338-3p |
| HIF1A hsa-mir-33a-5p |
| HIF1A hsa-mir-34b-5p |
| HIF1A hsa-mir-3609 |
| HIF1A hsa-mir-3662 |
| HIF1A hsa-mir-3668 |
| HIF1A hsa-mir-424-5p |
| HIF1A hsa-mir-4282 |
| HIF1A hsa-mir-429 |
| HIF1A hsa-mir-433-3p |
| HIF1A hsa-mir-4418 |
| HIF1A hsa-mir-4463 |
| HIF1A hsa-mir-4464 |
| HIF1A hsa-mir-4470 |
| HIF1A hsa-mir-4487 |
| HIF1A hsa-mir-4499 |
| HIF1A hsa-mir-449c-5p |
| HIF1A hsa-mir-4662a-5p |
| HIF1A hsa-mir-4735-3p |
| HIF1A hsa-mir-4748 |
| HIF1A hsa-mir-4799-5p |
| HIF1A hsa-mir-494-3p |
| HIF1A hsa-mir-497-3p |
| HIF1A hsa-mir-5089-3p |
| HIF1A hsa-mir-509-3-5p |
| HIF1A hsa-mir-5094 |
| HIF1A hsa-mir-509-5p |
| HIF1A hsa-mir-519c-3p |
| HIF1A hsa-mir-519d-3p |
| HIF1A hsa-mir-548ah-5p |
| HIF1A hsa-mir-558 |
| HIF1A hsa-mir-5681b |
| HIF1A hsa-mir-5692a |
| HIF1A hsa-mir-576-3p |
| HIF1A hsa-mir-589-3p |
| HIF1A hsa-mir-625-3p |
| HIF1A hsa-mir-6511a-5p |
| HIF1A hsa-mir-6755-5p |
| HIF1A hsa-mir-6806-5p |
| HIF1A hsa-mir-6807-3p |
| HIF1A hsa-mir-6808-5p |
| HIF1A hsa-mir-6815-3p |
| HIF1A hsa-mir-6893-5p |
| HIF1A hsa-mir-8055 |
| HIF1A hsa-mir-889-3p |
| HIF1A hsa-mir-935 |
| HIF1A hsa-mir-93-5p |
| HIF1A hsa-mir-940 |
| KRAS hsa-let-7a-5p |
| KRAS hsa-let-7c-3p |
| KRAS hsa-let-7g-5p |
| KRAS hsa-mir-124-5p |
| KRAS hsa-mir-126-3p |
| KRAS hsa-mir-134-5p |
| KRAS hsa-mir-1-3p |
| KRAS hsa-mir-143-3p |
| KRAS hsa-mir-152-3p |
| KRAS hsa-mir-155-5p |
| KRAS hsa-mir-16-5p |
| KRAS hsa-mir-181a-5p |
| KRAS hsa-mir-181c-5p |
| KRAS hsa-mir-183-5p |
| KRAS hsa-mir-18a-3p |
| KRAS hsa-mir-193a-3p |
| KRAS hsa-mir-193b-3p |
| KRAS hsa-mir-199a-5p |
| KRAS hsa-mir-200b-3p |
| KRAS hsa-mir-200c-3p |
| KRAS hsa-mir-204-3p |
| KRAS hsa-mir-206 |
| KRAS hsa-mir-216b-5p |
| KRAS hsa-mir-217 |
| KRAS hsa-mir-224-5p |
| KRAS hsa-mir-27a-3p |
| KRAS hsa-mir-30a-3p |
| KRAS hsa-mir-30d-3p |
| KRAS hsa-mir-30e-3p |
| KRAS hsa-mir-3125 |
| KRAS hsa-mir-3148 |
| KRAS hsa-mir-3192-5p |
| KRAS hsa-mir-326 |
| KRAS hsa-mir-330-5p |
| KRAS hsa-mir-340-5p |
| KRAS hsa-mir-3606-3p |
| KRAS hsa-mir-365a-3p |
| KRAS hsa-mir-384 |
| KRAS hsa-mir-3916 |
| KRAS hsa-mir-429 |
| KRAS hsa-mir-4314 |
| KRAS hsa-mir-4328 |
| KRAS hsa-mir-433-3p |
| KRAS hsa-mir-452-5p |
| KRAS hsa-mir-4646-5p |
| KRAS hsa-mir-4666b |
| KRAS hsa-mir-4689 |
| KRAS hsa-mir-4698 |
| KRAS hsa-mir-487b-3p |
| KRAS hsa-mir-5010-3p |
| KRAS hsa-mir-513a-3p |
| KRAS hsa-mir-513c-3p |
| KRAS hsa-mir-514a-5p |
| KRAS hsa-mir-543 |
| KRAS hsa-mir-548ae-3p |
| KRAS hsa-mir-548ah-3p |
| KRAS hsa-mir-548aj-3p |
| KRAS hsa-mir-548am-3p |
| KRAS hsa-mir-548aq-3p |
| KRAS hsa-mir-548j-3p |
| KRAS hsa-mir-548x-3p |
| KRAS hsa-mir-5582-3p |
| KRAS hsa-mir-613 |
| KRAS hsa-mir-619-5p |
| KRAS hsa-mir-622 |
| KRAS hsa-mir-642a-5p |
| KRAS hsa-mir-642b-5p |
| KRAS hsa-mir-6506-5p |
| KRAS hsa-mir-671-5p |
| KRAS hsa-mir-6716-5p |
| KRAS hsa-mir-6859-5p |
| KRAS hsa-mir-6866-5p |
| KRAS hsa-mir-873-5p |
| KRAS hsa-mir-877-5p |
| KRAS hsa-mir-892b |
| KRAS hsa-mir-96-5p |
| PPARG hsa-mir-130a-3p |
| PPARG hsa-mir-130b-3p |
| PPARG hsa-mir-138-5p |
| PPARG hsa-mir-1-3p |
| PPARG hsa-mir-192-5p |
| PPARG hsa-mir-20a-5p |
| PPARG hsa-mir-20b-5p |
| PPARG hsa-mir-215-5p |
| PPARG hsa-mir-218-5p |
| PPARG hsa-mir-27a-3p |
| PPARG hsa-mir-27b-3p |
